# Supplementary material for: Unraveling the Sex Chromosome Heteromorphism of the Paradoxical Frog Pseudis tocantins
Source: PubMed Central journal article supplement (PMC4877019; doi:10.1371/journal.pone.0156176), 2016-05-23
Supplement: pone.0156176.s001.pdf [file pone.0156176.s001.pdf]

**S1 Table. Mean similarity (%) and standard error ( $\pm$ ) between the more conserved region of the PcP190 sequences of *Pseudis tocantins*, *Physalaemus cuvieri*, *Physalaemus centralis*, *Physalaemus albonotatus*, *Physalaemus albifrons*, *Physalaemus ephippifer*, *Physalaemus marmoratus*, *Leptodactylus latrans* and *Crossodactylus gaudichaudii*. Only complete monomers were used in this analysis. Because no complete monomer of PcP-6 was achieved, this kind of sequence was not included. N: number of sequences from each group.**

|                         | <i>P. cuvieri</i> <sup>a</sup><br>(n=13) | <i>P. centralis</i> <sup>b</sup><br>(n=5) | <i>P. albonotatus</i> <sup>c</sup><br>(n=5) | <i>P. albifrons</i> <sup>d</sup><br>(n=5) | <i>P. ephippifer</i> <sup>e</sup><br>(n=2) | <i>P. marmoratus</i> <sup>f</sup><br>(n=6) | <i>L. latrans</i> <sup>g</sup><br>(n=7) | <i>C. gaudichaudii</i> <sup>h</sup><br>(n=2) | PcP-1a                  | PcP-2                   | PcP-3                   | PcP-4                   | PcP-5                   | PcP-7a                  |
|-------------------------|------------------------------------------|-------------------------------------------|---------------------------------------------|-------------------------------------------|--------------------------------------------|--------------------------------------------|-----------------------------------------|----------------------------------------------|-------------------------|-------------------------|-------------------------|-------------------------|-------------------------|-------------------------|
| <b>PcP-1</b><br>(n=1)   | 90.31<br>( $\pm 2.08$ )                  | 90.83<br>( $\pm 2.18$ )                   | 88.17<br>( $\pm 2.67$ )                     | 89.63<br>( $\pm 2.23$ )                   | 92.50<br>( $\pm 2.30$ )                    | 89.99<br>( $\pm 2.52$ )                    | 83.33<br>( $\pm 3.12$ )                 | 88.75<br>( $\pm 2.44$ )                      | -                       |                         |                         |                         |                         |                         |
| <b>PcP-2</b><br>(n=4)   | 81.86<br>( $\pm 2.54$ )                  | 82.12<br>( $\pm 2.61$ )                   | 82.98<br>( $\pm 2.63$ )                     | 83.34<br>( $\pm 2.41$ )                   | 85.46<br>( $\pm 2.55$ )                    | 85.05<br>( $\pm 2.48$ )                    | 80.80<br>( $\pm 2.98$ )                 | 83.01<br>( $\pm 2.66$ )                      | 82.28<br>( $\pm 2.91$ ) | -                       |                         |                         |                         |                         |
| <b>PcP-3</b><br>(n=1)   | 88.39<br>( $\pm 2.22$ )                  | 90.17<br>( $\pm 2.22$ )                   | 87.00<br>( $\pm 2.74$ )                     | 86.46<br>( $\pm 2.59$ )                   | 90.00<br>( $\pm 2.56$ )                    | 89.99<br>( $\pm 2.43$ )                    | 82.98<br>( $\pm 3.22$ )                 | 84.58<br>( $\pm 2.85$ )                      | 88.33<br>( $\pm 2.87$ ) | 80.40<br>( $\pm 3.00$ ) | -                       |                         |                         |                         |
| <b>PcP-4</b><br>(n=3)   | 87.01<br>( $\pm 2.16$ )                  | 88.51<br>( $\pm 2.15$ )                   | 88.24<br>( $\pm 2.25$ )                     | 87.32<br>( $\pm 2.28$ )                   | 90.92<br>( $\pm 2.20$ )                    | 89.39<br>( $\pm 2.11$ )                    | 86.62<br>( $\pm 2.56$ )                 | 87.73<br>( $\pm 2.34$ )                      | 86.52<br>( $\pm 2.74$ ) | 82.99<br>( $\pm 2.63$ ) | 84.86<br>( $\pm 2.86$ ) | -                       |                         |                         |
| <b>PcP-5</b><br>(n=1)   | 89.61<br>( $\pm 2.17$ )                  | 90.67<br>( $\pm 2.31$ )                   | 88.67<br>( $\pm 2.62$ )                     | 89.80<br>( $\pm 2.23$ )                   | 93.75<br>( $\pm 2.09$ )                    | 90.68<br>( $\pm 2.46$ )                    | 84.52<br>( $\pm 3.01$ )                 | 88.75<br>( $\pm 2.37$ )                      | 89.17<br>( $\pm 2.76$ ) | 81.42<br>( $\pm 2.97$ ) | 85.83<br>( $\pm 3.18$ ) | 87.37<br>( $\pm 2.69$ ) | -                       |                         |
| <b>PcP-7 a</b><br>(n=5) | 83.66<br>( $\pm 2.67$ )                  | 84.18<br>( $\pm 2.81$ )                   | 85.05<br>( $\pm 2.81$ )                     | 85.63<br>( $\pm 2.49$ )                   | 87.66<br>( $\pm 2.68$ )                    | 86.48<br>( $\pm 2.69$ )                    | 83.66<br>( $\pm 3.08$ )                 | 85.05<br>( $\pm 2.60$ )                      | 85.05<br>( $\pm 2.97$ ) | 90.68<br>( $\pm 1.61$ ) | 80.87<br>( $\pm 3.32$ ) | 86.20<br>( $\pm 2.55$ ) | 83.31<br>( $\pm 3.05$ ) | -                       |
| <b>PcP-7 b</b><br>(n=5) | 88.63<br>( $\pm 1.77$ )                  | 89.34<br>( $\pm 1.91$ )                   | 88.04<br>( $\pm 2.20$ )                     | 88.59<br>( $\pm 1.84$ )                   | 92.40<br>( $\pm 1.70$ )                    | 91.25<br>( $\pm 1.77$ )                    | 84.27<br>( $\pm 2.83$ )                 | 87.70<br>( $\pm 2.10$ )                      | 89.91<br>( $\pm 2.08$ ) | 86.26<br>( $\pm 2.08$ ) | 86.11<br>( $\pm 2.60$ ) | 87.50<br>( $\pm 2.19$ ) | 89.08<br>( $\pm 2.29$ ) | 88.51<br>( $\pm 2.11$ ) |

<sup>a</sup>*Physalaemus cuvieri* sequences: JF281121.1, JF281117.1, JF281124.1 and JF281119.1, <sup>b</sup>*Physalaemus centralis* sequences: KM361684.1 - KM361688.1, <sup>c</sup>*Physalaemus albonotatus* sequences: KM361689.1 - KM361693.1, <sup>d</sup>*Physalaemus albifrons* sequences: KM361694.1 - KM361698.1, <sup>e</sup>*Physalaemus ephippifer* sequences: KM361699.1 and KM361700.1, <sup>f</sup>*Physalaemus marmoratus* sequences: KM361701.1 - KM361706.1, <sup>g</sup>*Leptodactylus latrans* sequences: KM361718.1 - KM361724.1, <sup>h</sup>*Crossodactylus gaudichaudii* sequences: KM361725.1 and KM361726.1.
